# Supplementary material for: Genome-wide survey of codons under diversifying selection in a highly recombining bacterial species, Helicobacter pylori
Source: PubMed Central journal article supplement — DNA Res. 2016 Mar 8;23(2):135–43. doi: 10.1093/dnares/dsw003 (PMC4833421; doi:10.1093/dnares/dsw003), 2016-03-08

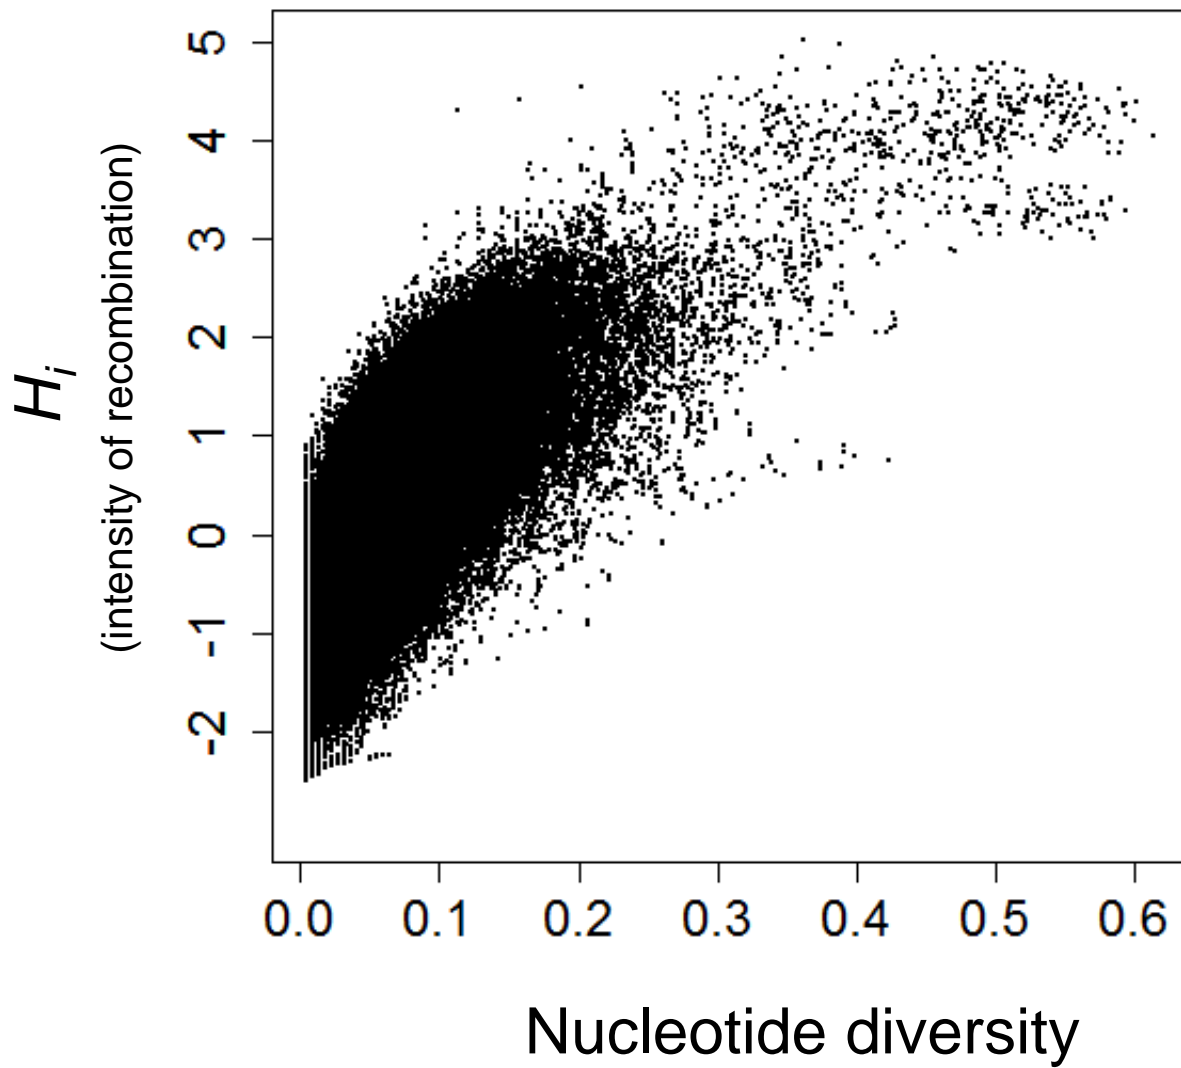

**Figure S1.** Relation between nucleotide diversity and estimated intensity of recombination ( $H_i$ ). Each dot indicated a nucleotide.

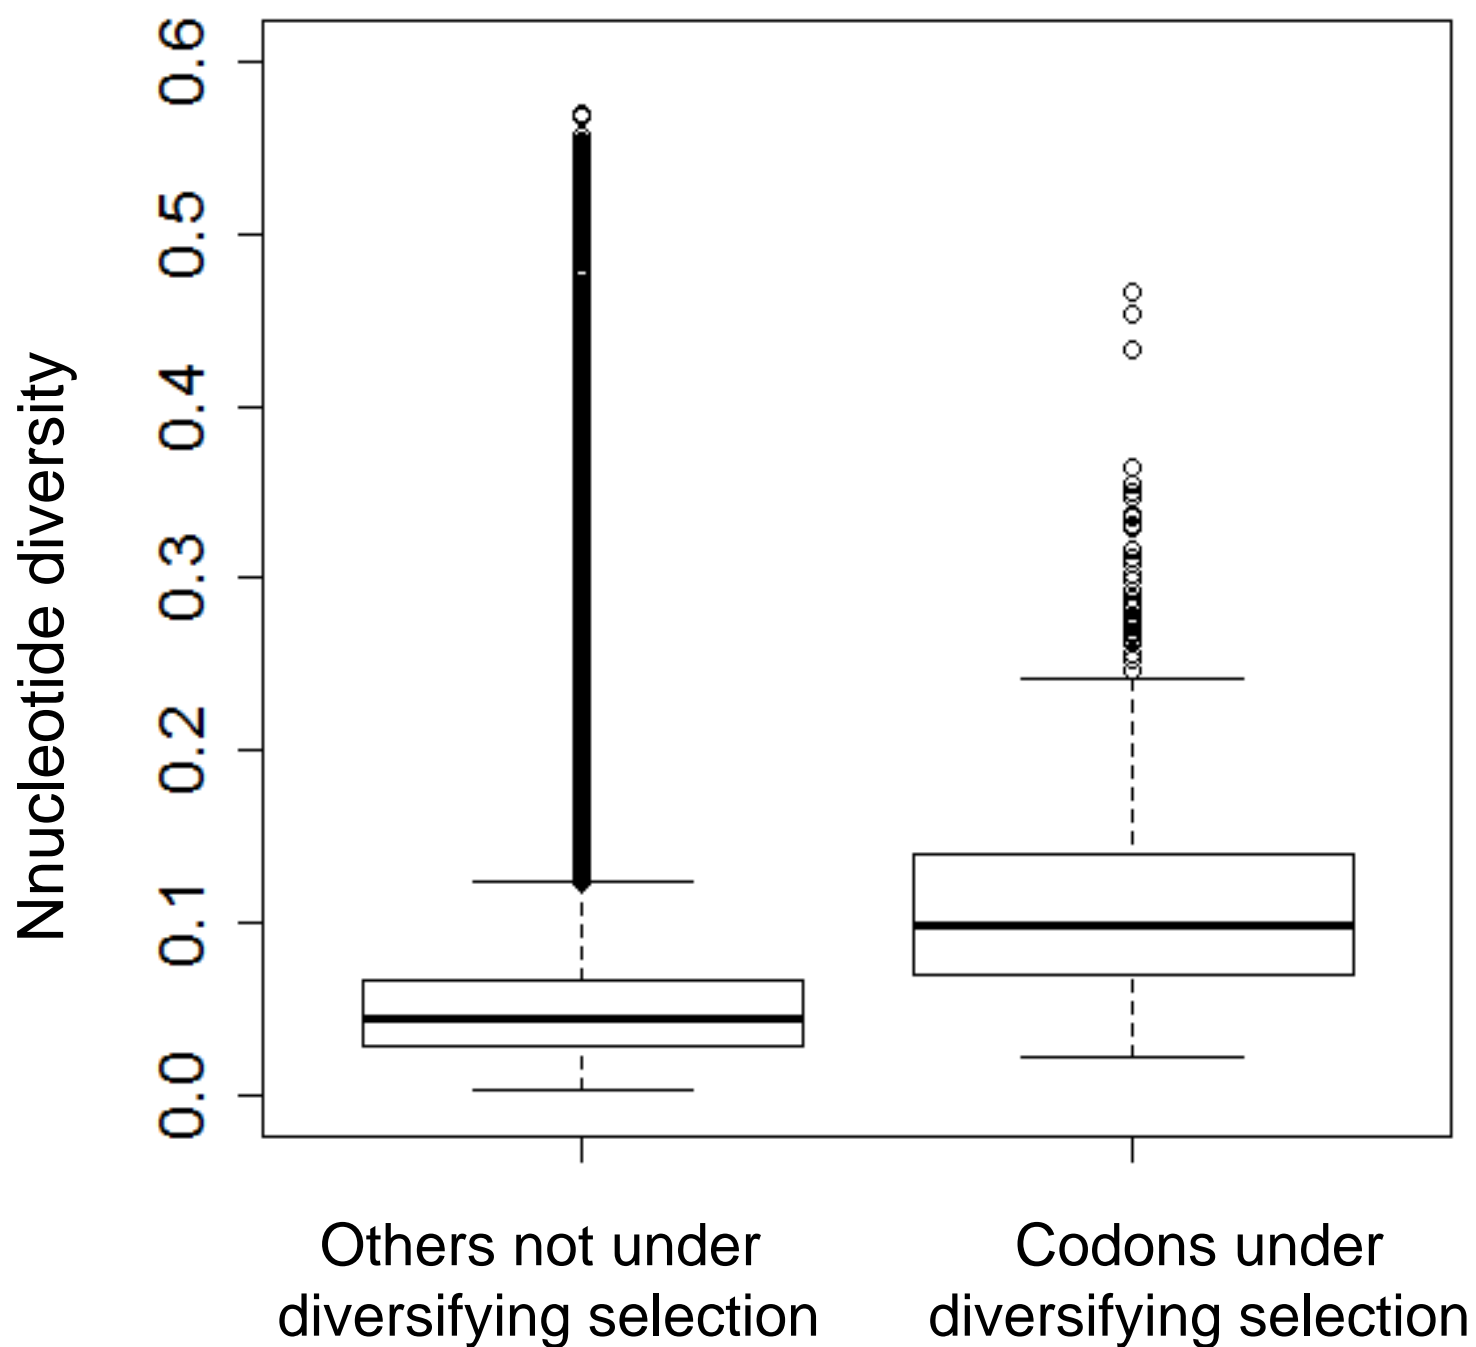

**Figure S2.** Comparison of nucleotide diversity between codons under diversifying selection and others not under diversifying selection. The format of the box plot is the same as in Figure 5.

Only for response

By 15bp windows

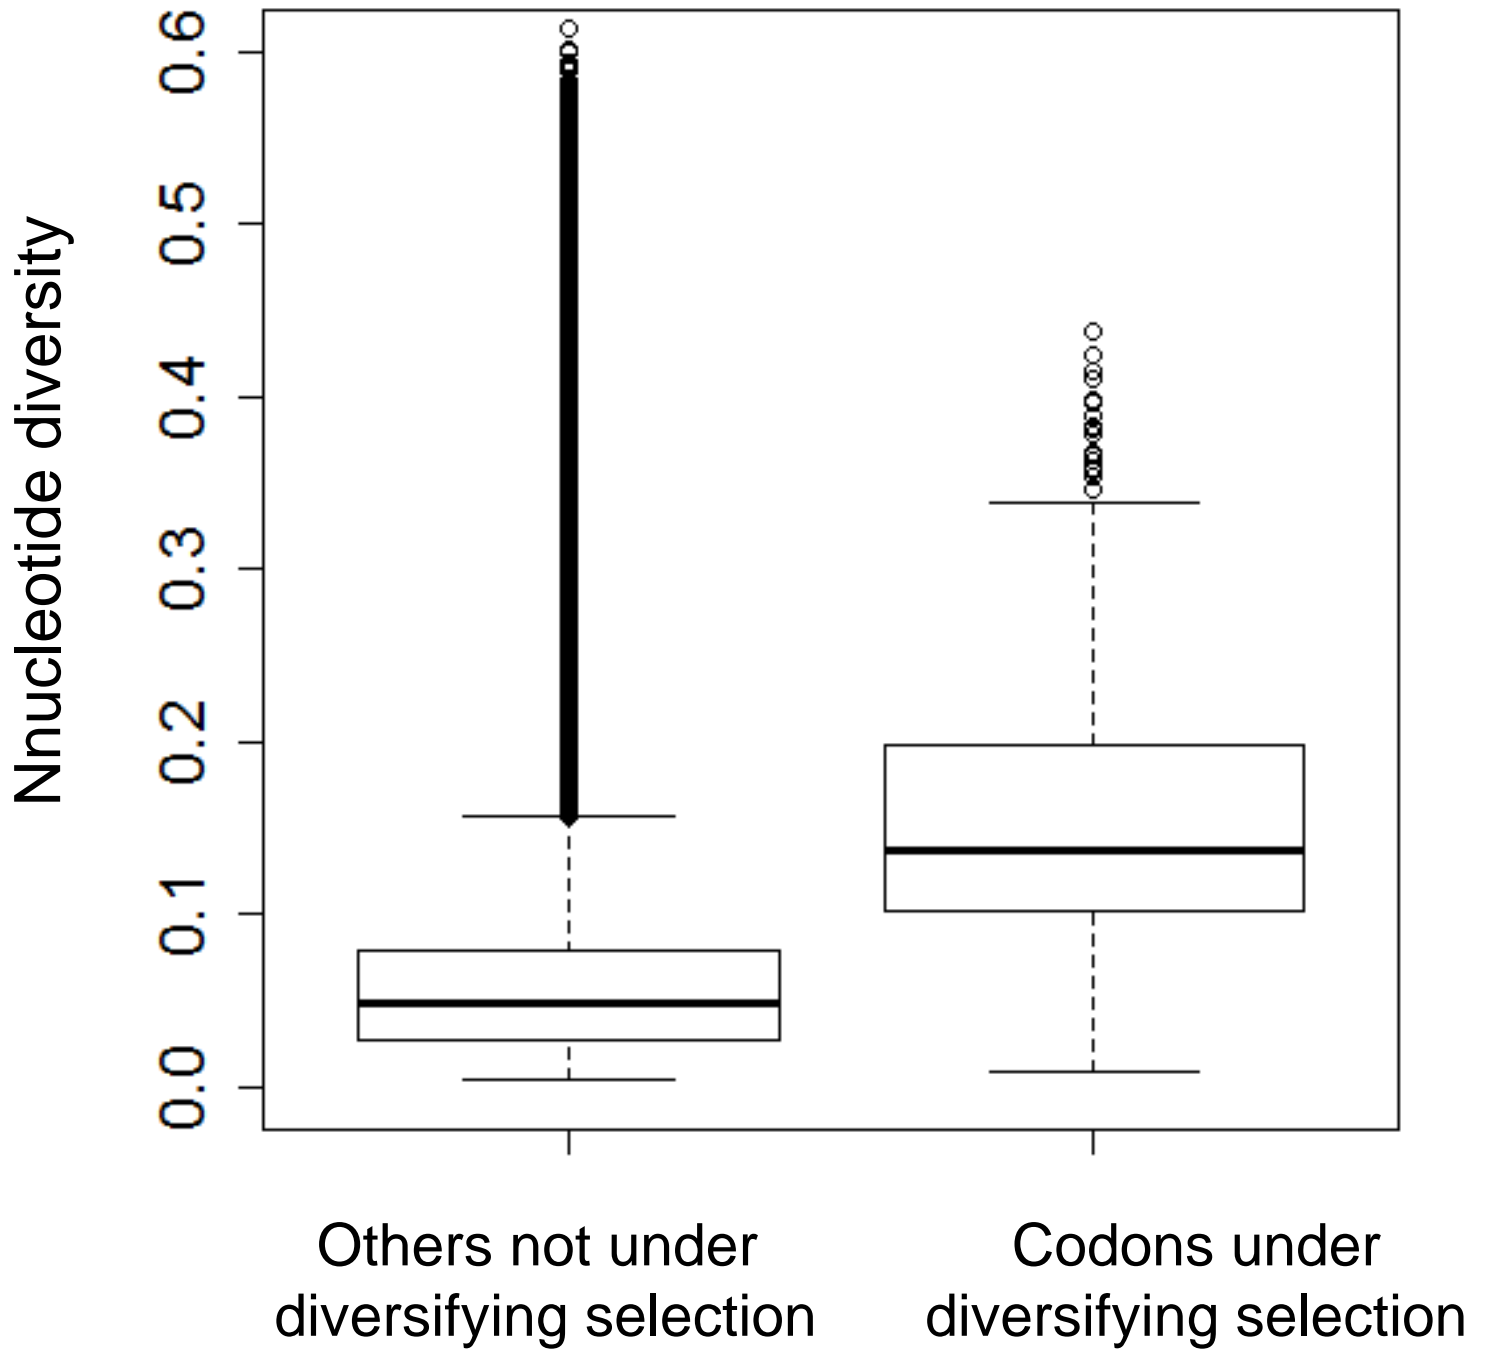

By 30bp windows

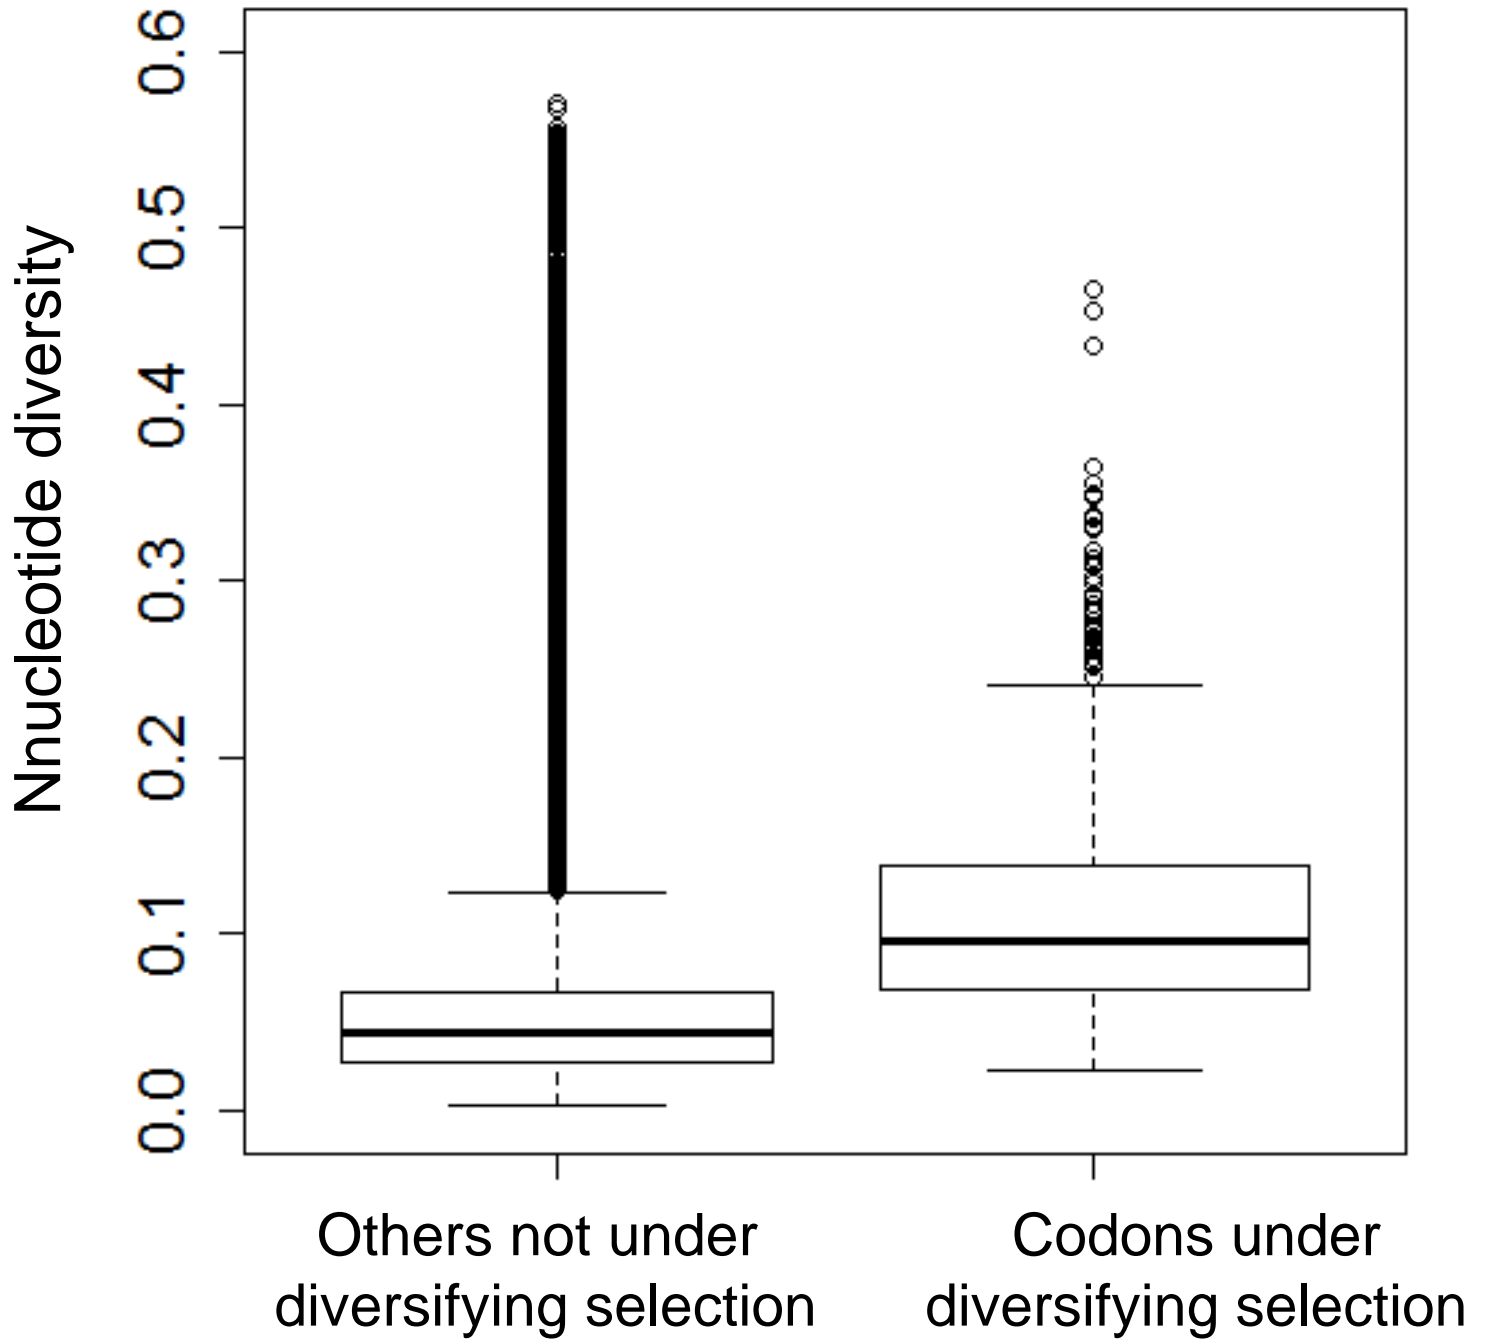

Supplement: supp_dsw003_dsw003supp_figures.pdf [file supp_dsw003_dsw003supp_figures.pdf]
